# Supplementary material
Source: publisher site journal article supplement (https://www.dovepress.com/article/337518)
Supplement: Supplementary file 1 [file get_supplementary_file.php]

**Supplemental Table 1: Dose of Beclomethasone Equivalent on Clinical Variables<sup>a</sup>**

|                                                | Regression Coefficient | p value | Odds Ratio | 95% Confidence Interval |
|------------------------------------------------|------------------------|---------|------------|-------------------------|
| <b>Ventilator</b>                              | 0.0008                 | 0.15    | 1.00       | 0.99, 1.00              |
| <b>Intensive Care Unit (ICU) Admission</b>     | 0.0001                 | 0.74    | 1.00       | 0.99, 1.00              |
| <b>Discharged on Oxygen</b>                    | 0.0002                 | 0.73    | 1.00       | 0.99, 1.00              |
| <b>Initial Chest Radiograph</b>                |                        |         |            |                         |
| Clear                                          | -0.00001               | 0.99    | 1.00       | 0.99, 1.00              |
| Ground Glass Opacities (GGO)                   | 0.0007                 | 0.31    | 1.00       | 0.99, 1.00              |
| Infiltrate/Opacities/Consolidation             | -0.0003                | 0.55    | 1.00       | 0.99, 1.00              |
| Pleural Effusion                               | -0.0022                | 0.45    | 1.00       | 0.99, 1.00              |
| <b>Most Severe Finding on Chest Radiograph</b> |                        |         |            |                         |
| Clear                                          | 0.0004                 | 0.67    | 1.00       | 0.99, 1.00              |
| Ground Glass Opacities (GGO)                   | 0.0011                 | 0.05    | 1.00       | 0.99, 1.00              |
| Infiltrate/Opacities/Consolidation             | -0.0005                | 0.35    | 1.00       | 0.99, 1.00              |
| Pleural Effusion                               | -0.0009                | 0.53    | 1.00       | 0.99, 1.00              |
| <b>Mortality</b>                               | -0.0001                | 0.84    | 1.00       | 0.99, 1.00              |

Abbreviations: ICU, intensive care unit

<sup>a</sup> Individual logistic regression analyses were performed with beclomethasone equivalent doses and each respective clinical variable. Data for each test summarized in above table.

**Supplemental Table 2A: Initial Lab Values on Intensive Care Unit (ICU) Admission<sup>a</sup>**

|                                   | Regression Coefficient | p value | Odds Ratio | 95% Confidence Interval |
|-----------------------------------|------------------------|---------|------------|-------------------------|
| Initial ESR (mm/hr)               | -0.0002                | 0.95    | 1.00       | 0.99, 1.00              |
| Initial WBC (K/uL)                | 0.0817                 | <0.001  | 1.09       | 1.05, 1.13              |
| Initial Lymphocyte Count (K/uL)   | 0.0516                 | 0.14    | 1.05       | 0.99, 1.15              |
| Initial Neutrophil Count (K/uL)   | 0.0136                 | 0.08    | 1.01       | 0.99, 1.03              |
| Initial Procalcitonin (ng/mL)     | 0.0126                 | 0.05    | 1.01       | 1.00, 1.03              |
| Initial AST (U/L)                 | 0.0030                 | 0.01    | 1.00       | 1.00, 1.01              |
| Initial ALT (U/L)                 | 0.0032                 | 0.02    | 1.00       | 1.00, 1.01              |
| Initial CRP absolute (mg/dL)      | 0.0045                 | 0.09    | 1.00       | 0.99, 1.01              |
| Initial ferritin absolute (ng/mL) | 0.0003                 | <0.001  | 1.00       | 1.00, 1.00              |
| Initial D Dimer absolute          | 0.00001                | 0.44    | 1.00       | 0.99, 1.00              |
| Initial Troponin absolute (ng/L)  | 0.0109                 | 0.04    | 1.01       | 1.00, 1.03              |

**Supplemental Table 2B: Initial Lab Values on Need for Ventilator<sup>b</sup>**

|                                   | Regression Coefficient | p value | Odds Ratio | 95% Confidence Interval |
|-----------------------------------|------------------------|---------|------------|-------------------------|
| Initial ESR (mm/hr)               | 0.0026                 | 0.50    | 1.00       | 0.99, 1.01              |
| Initial WBC (K/uL)                | 0.0484                 | 0.002   | 1.05       | 1.02, 1.09              |
| Initial Lymphocyte Count (K/uL)   | 0.0442                 | 0.14    | 1.05       | 0.99, 1.13              |
| Initial Neutrophil Count (K/uL)   | 0.0043                 | 0.59    | 1.00       | 0.99, 1.02              |
| Initial Procalcitonin (ng/mL)     | 0.0126                 | 0.04    | 1.01       | 1.00, 1.03              |
| Initial AST (U/L)                 | 0.0025                 | 0.01    | 1.00       | 1.00, 1.01              |
| Initial ALT (U/L)                 | 0.0025                 | 0.08    | 1.00       | 0.99, 1.01              |
| Initial CRP absolute (mg/dL)      | 0.0029                 | 0.30    | 1.00       | 0.99, 1.01              |
| Initial ferritin absolute (ng/mL) | 0.00004                | <0.001  | 1.00       | 1.00, 1.00              |
| Initial D Dimer absolute          | 0.00002                | 0.21    | 1.00       | 0.99, 1.00              |
| Initial Troponin absolute (ng/L)  | 0.0133                 | 0.02    | 1.01       | 1.00, 1.03              |

**Supplemental Table 2C: Initial Lab Values on Need for Oxygen on Discharge<sup>c</sup>**

|                                   | Regression Coefficient | p value | Odds Ratio | 95% Confidence Interval |
|-----------------------------------|------------------------|---------|------------|-------------------------|
| Initial ESR (mm/hr)               | -0.0006                | 0.90    | 1.00       | 0.99, 1.01              |
| Initial WBC (K/uL)                | 0.0009                 | 0.94    | 1.00       | 0.97, 1.03              |
| Initial Lymphocyte Count (K/uL)   | -0.4894                | 0.01    | 0.61       | 0.42, 0.86              |
| Initial Neutrophil Count (K/uL)   | -0.0058                | 0.61    | 0.99       | 0.97, 1.01              |
| Initial Procalcitonin (ng/mL)     | 0.0047                 | 0.35    | 1.00       | 0.99, 1.02              |
| Initial AST (U/L)                 | -0.0012                | 0.57    | 1.00       | 0.99, 1.00              |
| Initial ALT (U/L)                 | -0.0010                | 0.67    | 1.00       | 0.99, 1.00              |
| Initial CRP absolute (mg/dL)      | 0.0019                 | 0.54    | 1.00       | 0.99, 1.01              |
| Initial ferritin absolute (ng/mL) | 0.00007                | 0.43    | 1.00       | 0.99, 1.00              |
| Initial D Dimer absolute          | -0.00006               | 0.19    | 1.00       | 0.99, 1.00              |
| Initial Troponin absolute (ng/L)  | -0.0101                | 0.39    | 0.99       | 0.96, 1.00              |

**Supplemental Table 2D: Initial Lab Values on Mortality<sup>d</sup>**

|                                   | Regression Coefficient | p value | Odds Ratio | 95% Confidence Interval |
|-----------------------------------|------------------------|---------|------------|-------------------------|
| Initial ESR (mm/hr)               | 0.0073                 | 0.09    | 1.01       | 0.99, 1.02              |
| Initial WBC (K/uL)                | 0.0395                 | 0.007   | 1.04       | 1.01, 1.07              |
| Initial Lymphocyte Count (K/uL)   | 0.0360                 | 0.17    | 1.04       | 0.99, 1.11              |
| Initial Neutrophil Count (K/uL)   | 0.0067                 | 0.39    | 1.01       | 0.99, 1.02              |
| Initial Procalcitonin (ng/mL)     | 0.0149                 | 0.02    | 1.02       | 1.00, 1.03              |
| Initial AST (U/L)                 | 0.0032                 | 0.007   | 1.00       | 1.00, 1.01              |
| Initial ALT (U/L)                 | 0.0012                 | 0.42    | 1.00       | 0.99, 1.00              |
| Initial CRP absolute (mg/dL)      | 0.0026                 | 0.36    | 1.00       | 0.99, 1.01              |
| Initial ferritin absolute (ng/mL) | 0.0003                 | <0.001  | 1.00       | 1.00, 1.00              |
| Initial D Dimer absolute          | 0.00004                | 0.03    | 1.00       | 1.00, 1.00              |
| Initial Troponin absolute (ng/L)  | 0.0032                 | 0.30    | 1.00       | 0.99, 1.01              |

Abbreviations: ICU, intensive care unit; ESR, erythrocyte sedimentation rate; WBC, white blood cell count;

AST, aspartate aminotransferase; ALT, alanine aminotransferase; CRP, c-reactive protein; mm/hr, millimeter per hour;

K/uL, thousands per cubic milliliter; ng/mL, nanograms per milliliter; U/L, units per liter; mg/dL, milligrams per deciliter;

ng/L, nanograms per liter

<sup>a,b,c,d</sup> Individual logistic regression analyses were performed for each initial lab value and respective clinical variables

**Supplemental Table 3: Laboratory Findings in Adult Asthmatics by ICS Use**

|                                    | N, if applicable <sup>a</sup> | Overall<br>n=787 | Any ICS Use<br>n=301 | No ICS Use<br>n=486 | p value |
|------------------------------------|-------------------------------|------------------|----------------------|---------------------|---------|
| <b>Labs, Mean (SD)</b>             |                               |                  |                      |                     |         |
| Initial ESR (mm/hr)                | 322                           | 62.7 (33.6)      | 65.4 (31.2)          | 60.9 (35.1)         | 0.24    |
| Peak ESR (mm/hr)                   | 310                           | 69.2 (39.2)      | 73.1 (37.8)          | 66.7 (40.0)         | 0.16    |
| Initial WBC (K/uL)                 | 785                           | 8.44 (7.04)      | 8.30 (4.12)          | 8.52 (8.35)         | 0.63    |
| Peak WBC (K/uL)                    | 778                           | 13.5 (11.4)      | 13.2 (7.99)          | 13.7 (13.1)         | 0.50    |
| Nadir WBC (K/uL)                   | 777                           | 6.24 (4.33)      | 6.15 (3.13)          | 6.29 (4.94)         | 0.64    |
| Initial Lymphocyte Count (K/uL)    | 782                           | 1.30 (3.23)      | 1.14 (1.67)          | 1.40 (3.89)         | 0.20    |
| Lowest Lymphocyte Count (K/uL)     | 768                           | 0.963 (1.79)     | 0.897 (1.70)         | 1.00(1.85)          | 0.43    |
| Initial Neutrophil Count (K/uL)    | 782                           | 7.27 (10.3)      | 7.24 (7.77)          | 7.29 (11.5)         | 0.94    |
| Peak Neutrophil Count (K/uL)       | 767                           | 10.8 (10.4)      | 10.7 (9.35)          | 10.8 (10.9)         | 0.90    |
| Initial Procalcitonin (ng/mL)      | 640                           | 2.61 (17.6)      | 4.06 (24.7)          | 1.65 (10.4)         | 0.14    |
| Initial AST (U/L)                  | 782                           | 58.3 (88.0)      | 59.2 (97.7)          | 57.7 (81.5)         | 0.83    |
| Peak AST (U/L)                     | 773                           | 245 (1360)       | 145 (933)            | 306 (1560)          | 0.07    |
| Initial ALT (U/L)                  | 782                           | 47.1 (55.5)      | 45.4 (56.1)          | 48.2 (55.2)         | 0.50    |
| Peak ALT (U/L)                     | 773                           | 175 (777)        | 168 (619)            | 179 (861)           | 0.85    |
| Tb cell CD3 absolute (cells/uL)    | 77                            | 551 (364)        | 542 (422)            | 556 (333)           | 0.88    |
| Tb cell CD3 percent                | 78                            | 74.9 (114)       | 98.0 (194)           | 62.7 (14.6)         | 0.35    |
| Tb cell CD4 absolute (cells/uL)    | 76                            | 348 (233)        | 364 (261)            | 340 (219)           | 0.68    |
| Tb cell CD4 percent                | 77                            | 38.3 (11.8)      | 37.5 (12.1)          | 38.7 (11.7)         | 0.66    |
| Tb cell CD8 absolute (cells/uL)    | 76                            | 203 (165)        | 209 (188)            | 199 (153)           | 0.81    |
| Tb cell CD8 percent                | 77                            | 24.6 (18.0)      | 27.2 (27.0)          | 23.3 (11.0)         | 0.48    |
| Tb cell CD19 absolute (cells/uL)   | 41                            | 164 (123)        | 167 (105)            | 163 (134)           | 0.91    |
| Tb cell CD1656 absolute (cells/uL) | 41                            | 487 (2200)       | 190 (174)            | 641 (2710)          | 0.40    |
| Tb cell CD1656 percent             | 41                            | 16.4 (9.69)      | 18.5 (10.6)          | 15.3 (9.21)         | 0.32    |
| Initial CRP absolute (mg/dL)       | 699                           | 16.3 (29.7)      | 20.7 (42.0)          | 13.3 (16.8)         | 0.006   |
| Peak CRP absolute (mg/dL)          | 691                           | 22.5 (40.8)      | 29.4 (59.0)          | 18.0 (20.2)         | 0.002   |
| Initial ferritin absolute (ng/mL)  | 664                           | 1020 (1890)      | 935 (1350)           | 1080 (2170)         | 0.30    |
| Peak ferritin absolute (ng/mL)     | 653                           | 1730 (4240)      | 1650 (3740)          | 1780 (4540)         | 0.70    |
| Initial D Dimer absolute (ng/mL)   | 593                           | 1470 (4800)      | 1410 (4390)          | 1500 (5050)         | 0.82    |
| Peak D Dimer absolute (ng/mL)      | 584                           | 4010 (9140)      | 4590 (9930)          | 3620 (8580)         | 0.22    |
| Initial Troponin absolute (ng/L)   | 419                           | 23.5 (359)       | 5.15 (18.3)          | 34.5 (454)          | 0.30    |
| Peak Troponin absolute (ng/L)      | 381                           | 51.4 (586)       | 8.87 (27.9)          | 78.7 (750)          | 0.16    |
| Cytokine IL 1 absolute (pg/mL)     | 37                            | 14.1 (38.6)      | 19.7 (54.8)          | 10.6 (25.0)         | 0.57    |
| Cytokine IL 6 absolute (pg/mL)     | 61                            | 132 (427)        | 117 (330)            | 140 (477)           | 0.85    |
| Cytokine IL 10 absolute (pg/mL)    | 41                            | 17.3 (20.5)      | 22.2 (29.0)          | 13.9 (10.7)         | 0.27    |
| Tb cell CD19 percent (cells/uL)    | 42                            | 20.6 (16.7)      | 18.1 (9.54)          | 22.0 (19.7)         | 0.40    |

Abbreviations: ICS, inhaled corticosteroid; SD, standard deviation; ESR, erythrocyte sedimentation rate; WBC, white blood cell count; AST, aspartate aminotransferase; ALT, alanine aminotransferase; Tb Cell, T and B cell subsets; CD, cluster of differentiation; CRP, c-reactive protein; IL, interleukin; mm/hr, millimeter per hour; K/uL, thousands per cubic milliliter; ng/mL, nanograms per milliliter; U/L, units per liter; cells/uL, cells per microliter; mg/dL, milligrams per deciliter; ng/L, nanograms per liter; pg/mL, picograms per milliliter

<sup>a</sup> Number of patients with respective lab values included in analyses
